# Supplementary material for: Insights into Resistance Mechanisms of Inhibitors to Mps1 C604Y Mutation via a Comprehensive Molecular Modeling Study
Source: MDPI journal article supplement (doi:10.3390/molecules23061488), 2018-06-20
Supplement: s1 [file s1]

# Insights into Resistance Mechanisms of Inhibitors to Mps1 C604Y Mutation via a Comprehensive Molecular Modeling Study

Yuan Chen <sup>1,2,†</sup>, Wenquan Yu <sup>2,†</sup>, Cui-cui Jiang <sup>2</sup> and Jin-gui Zheng <sup>1,\*</sup>

<sup>1</sup> College of Crop Science, Fujian Agriculture and Forestry University, Fuzhou 350003, China; katecy@163.com

<sup>2</sup> Institute of Agricultural Engineering and Technology, Fujian Academy of Agricultural Sciences, Fuzhou 350003, China; ywq333@163.net (W.Y.); yumin793@163.com (C.-C.J.)

\* Correspondence: jingui\_zheng@yeah.net; Tel./Fax: 86-0591-8343-8961

† These authors contributed equally to this work

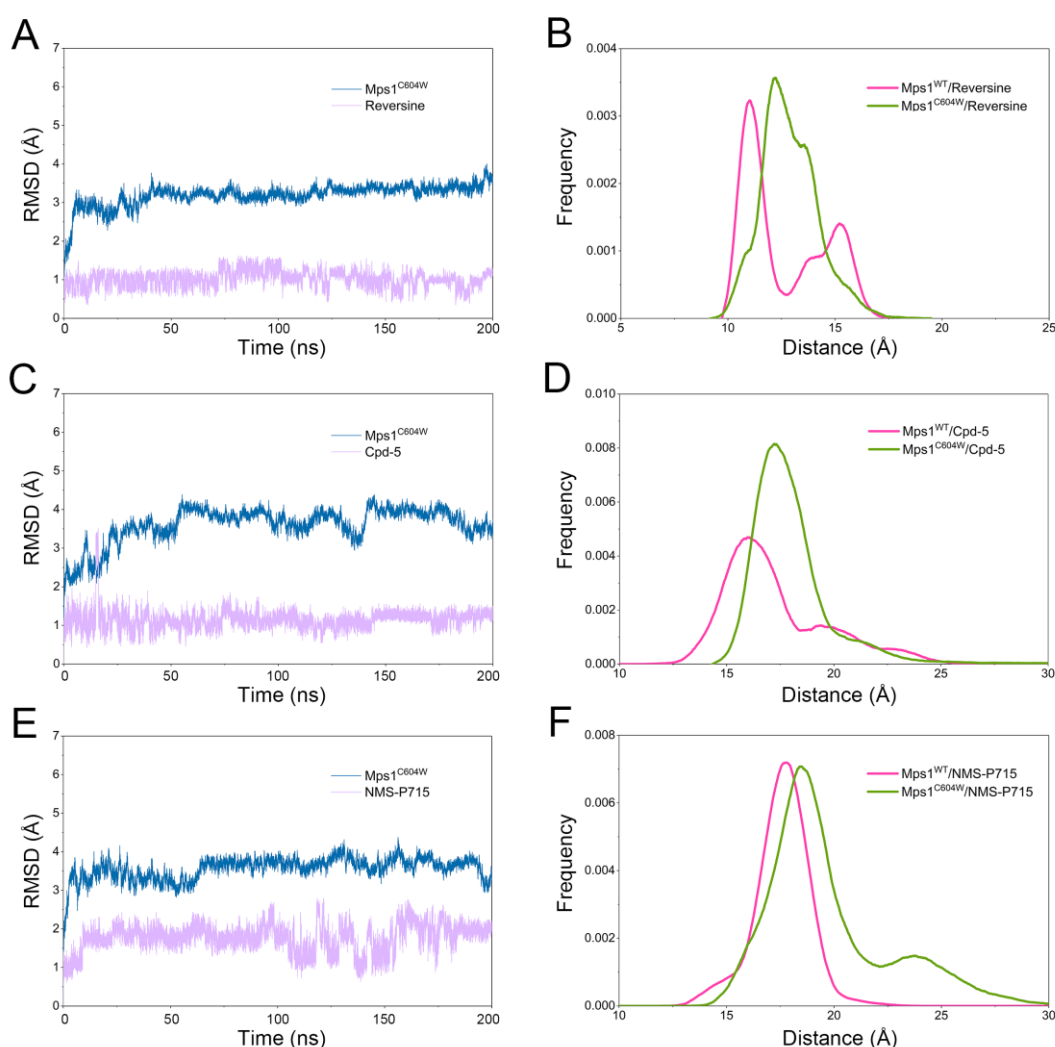

**Figure S1.** RMSD analysis of (A) Mps1<sup>C604W</sup>/reversine, (C) Mps1<sup>C604W</sup>/Cpd-5, (E) Mps1<sup>C604W</sup>/NMS-P715 from classical MD simulations. The distribution of the opening degree of the A-loop between (B) Mps1<sup>WT</sup>/reversine and Mps1<sup>C604W</sup>/reversine, (D) Mps1<sup>WT</sup>/Cpd-5 and Mps1<sup>C604W</sup>/Cpd-5, (F) Mps1<sup>WT</sup>/NMS-P715 and Mps1<sup>C604W</sup>/NMS-P715.
